# Supplementary material
Source: Elsevier journal article supplement (https://www.sciencedirect.com/science/article/pii/S1579212921000525)
Supplement: mmc2 [file S1579212921000525:mmc2.pdf]

# Patterns of physical activity progression in patients with COPD

## STROBE Statement—Checklist of items that should be included in reports of *cohort studies*

|                              | Item No | Recommendation                                                                                                                                                                       | Page No                                                                                               |
|------------------------------|---------|--------------------------------------------------------------------------------------------------------------------------------------------------------------------------------------|-------------------------------------------------------------------------------------------------------|
| <b>Title and abstract</b>    | 1       | (a) Indicate the study's design with a commonly used term in the title or the abstract                                                                                               | 2 (abstract page) of main text                                                                        |
|                              |         | (b) Provide in the abstract an informative and balanced summary of what was done and what was found                                                                                  | 2 (abstract page) of main text                                                                        |
| <b>Introduction</b>          |         |                                                                                                                                                                                      |                                                                                                       |
| Background/rationale         | 2       | Explain the scientific background and rationale for the investigation being reported                                                                                                 | 4 of main text                                                                                        |
| Objectives                   | 3       | State specific objectives, including any prespecified hypotheses                                                                                                                     | 4-5 of main text                                                                                      |
| <b>Methods</b>               |         |                                                                                                                                                                                      |                                                                                                       |
| Study design                 | 4       | Present key elements of study design early in the paper                                                                                                                              | 5 of main text                                                                                        |
| Setting                      | 5       | Describe the setting, locations, and relevant dates, including periods of recruitment, exposure, follow-up, and data collection                                                      | 5 of main text                                                                                        |
| Participants                 | 6       | (a) Give the eligibility criteria, and the sources and methods of selection of participants. Describe methods of follow-up                                                           | 5 of main text                                                                                        |
|                              |         | (b) For matched studies, give matching criteria and number of exposed and unexposed                                                                                                  | Not applicable                                                                                        |
| Variables                    | 7       | Clearly define all outcomes, exposures, predictors, potential confounders, and effect modifiers. Give diagnostic criteria, if applicable                                             | 6-7 of main text                                                                                      |
| Data sources/<br>measurement | 8*      | For each variable of interest, give sources of data and details of methods of assessment (measurement). Describe comparability of assessment methods if there is more than one group | 6-7 of main text                                                                                      |
| Bias                         | 9       | Describe any efforts to address potential sources of bias                                                                                                                            | 7-8 of main text, 2-3 of supplementary material                                                       |
| Study size                   | 10      | Explain how the study size was arrived at                                                                                                                                            | 3 of supplementary material                                                                           |
| Quantitative variables       | 11      | Explain how quantitative variables were handled in the analyses. If applicable, describe which groupings were chosen and why                                                         | 7-8 of main text, 2-3 of supplementary material                                                       |
| Statistical methods          | 12      | (a) Describe all statistical methods, including those used to control for confounding                                                                                                | 7-8 of main text, 2-3 of supplementary material                                                       |
|                              |         | (b) Describe any methods used to examine subgroups and interactions                                                                                                                  | 7-8 of main text, 2-3 of supplementary material                                                       |
|                              |         | (c) Explain how missing data were addressed                                                                                                                                          | 7, 22-23 (Table 1) and 24-25 (Table 2) of main text; 5-7 (Tables S1 and S2) of supplementary material |

|                  |     |                                                                                                                                                                                                                                                                                                 |                                                                                                                                                                                                                                                     |
|------------------|-----|-------------------------------------------------------------------------------------------------------------------------------------------------------------------------------------------------------------------------------------------------------------------------------------------------|-----------------------------------------------------------------------------------------------------------------------------------------------------------------------------------------------------------------------------------------------------|
|                  |     | (d) If applicable, explain how loss to follow-up was addressed                                                                                                                                                                                                                                  | 7 of main text; 2, 4 (Figure S1) of supplementary material                                                                                                                                                                                          |
|                  |     | (e) Describe any sensitivity analyses                                                                                                                                                                                                                                                           | 8 of main text, 2-3 of supplementary material                                                                                                                                                                                                       |
| <b>Results</b>   |     |                                                                                                                                                                                                                                                                                                 |                                                                                                                                                                                                                                                     |
| Participants     | 13* | (a) Report numbers of individuals at each stage of study—eg numbers potentially eligible, examined for eligibility, confirmed eligible, included in the study, completing follow-up, and analysed<br>(b) Give reasons for non-participation at each stage<br>(c) Consider use of a flow diagram | 8 of main text; 4 (Figure S1) of supplementary material<br><br>4 (Figure S1) of supplementary material<br><br>4 (Figure S1) of supplementary material                                                                                               |
| Descriptive data | 14* | (a) Give characteristics of study participants (eg demographic, clinical, social) and information on exposures and potential confounders<br>(b) Indicate number of participants with missing data for each variable of interest<br>(c) Summarise follow-up time (eg, average and total amount)  | 8-10 and 22-23 (Table 1) of main text<br><br>22-25 (Tables 1 and 2) of main text, 5-7 (Tables S1 and S2) of supplementary material<br><br>8-10 of main text (Figures 1 and 2), 24-25 of main text (Table 2), 7 (Table S2 of supplementary material) |
| Outcome data     | 15* | Report numbers of outcome events or summary measures over time                                                                                                                                                                                                                                  | 8-10 and 24-26 of main text, (Tables 2 and 3)                                                                                                                                                                                                       |

|                          |    |                                                                                                                                                                                                                                                                                                                                                                                                                       |                                                                                                                        |
|--------------------------|----|-----------------------------------------------------------------------------------------------------------------------------------------------------------------------------------------------------------------------------------------------------------------------------------------------------------------------------------------------------------------------------------------------------------------------|------------------------------------------------------------------------------------------------------------------------|
| Main results             | 16 | (a) Give unadjusted estimates and, if applicable, confounder-adjusted estimates and their precision (eg, 95% confidence interval). Make clear which confounders were adjusted for and why they were included<br><br>(b) Report category boundaries when continuous variables were categorized<br><br>(c) If relevant, consider translating estimates of relative risk into absolute risk for a meaningful time period | 8-10 and 24-26 of main text (Tables 2 and 3)<br><br>8-10 and 24-26 of main text (Tables 2 and 3)<br><br>Not applicable |
| Other analyses           | 17 | Report other analyses done—eg analyses of subgroups and interactions, and sensitivity analyses                                                                                                                                                                                                                                                                                                                        | 9-10 of main text, 8-10 (Tables S3-S5) of supplementary material                                                       |
| <b>Discussion</b>        |    |                                                                                                                                                                                                                                                                                                                                                                                                                       |                                                                                                                        |
| Key results              | 18 | Summarise key results with reference to study objectives                                                                                                                                                                                                                                                                                                                                                              | 10 of main text                                                                                                        |
| Limitations              | 19 | Discuss limitations of the study, taking into account sources of potential bias or imprecision. Discuss both direction and magnitude of any potential bias                                                                                                                                                                                                                                                            | 14 of main text                                                                                                        |
| Interpretation           | 20 | Give a cautious overall interpretation of results considering objectives, limitations, multiplicity of analyses, results from similar studies, and other relevant evidence                                                                                                                                                                                                                                            | 10-15 of main text                                                                                                     |
| Generalisability         | 21 | Discuss the generalisability (external validity) of the study results                                                                                                                                                                                                                                                                                                                                                 | 13 of main text                                                                                                        |
| <b>Other information</b> |    |                                                                                                                                                                                                                                                                                                                                                                                                                       |                                                                                                                        |
| Funding                  | 22 | Give the source of funding and the role of the funders for the present study and, if applicable, for the original study on which the present article is based                                                                                                                                                                                                                                                         | 6 of authorship page                                                                                                   |
